# Supplementary material
Source: Research Square preprint supplement (doi:10.21203/rs.3.rs-9600560/v1)
Supplement: Supplementary file 1 [file 90ad477a7a61843d9f9ffb71.docx]

| **Table 1.** Definition of variables | | |
| --- | --- | --- |
| ***Variable*** | ***Variable Description*** | ***Unit*** |
| *WS* | SDG 6.4.2. Water Stress | % |
| *AgritoWS* | SDG 6.4.2. Agricultural Sector Contribution to Water Stress | % |
| *IndtoWS* | SDG 6.4.2. Industrial Sector Contribution to Water Stress | % |
| *ServtoWS* | SDG 6.4.2. Services Sector Contribution to Water Stress | % |
| *GDP* | Gross Domestic Product | Current US$ |
| *GDPper* | GDP per capita | Current US$/inhab |
| *AgritoGDP* | Agriculture, value added to GDP | Current US$ |
| *IndtoGDP* | Industry, value added to GDP | Current US$ |
| *ServtoGDP* | Services, value added to GDP | Current US$ |
| *AgriWUE* | SDG 6.4.1. Irrigated Agriculture Water Use Efficiency | US$/m3 |
| *IndWUE* | SDG 6.4.1. Industrial Water Use Efficiency | US$/m3 |
| *ServWUE* | SDG 6.4.1. Services Water Use Efficiency | US$/m3 |

| **Table 2.** Descriptive statistics | | | | |
| --- | --- | --- | --- | --- |
| ***Variables*** | ***Mean*** | ***Std. Dev.*** | ***Max.*** | ***Min.*** |
| *WS* | 22.994 | 19.938 | 91.287 | 0.993 |
| *AgritoWS* | 6.126 | 9.550 | 58.439 | 0.008 |
| *IndtoWS* | 10.582 | 13.085 | 71.792 | 0.107 |
| *ServtoWS* | 6.238 | 8.563 | 51.065 | 0.124 |
| *GDP* | 5.77E+11 | 8.79E+11 | 4.28E+12 | 5.45E+09 |
| *GDPper* | 33,279.960 | 23,286.520 | 133,867.200 | 2670.580 |
| *AgritoGDP* | 9.69E+09 | 1.25E+10 | 5.31E+10 | 74,445,055 |
| *IndtoGDP* | 1.19E+11 | 1.88E+11 | 1.02E+12 | 1.18E+09 |
| *ServtoGDP* | 3.89E+11 | 5.99E+11 | 2.83E+12 | 3.45E+09 |
| *AgriWUE* | 1.916 | 5.318 | 53.696 | 0.001 |
| *IndWUE* | 243.818 | 563.746 | 5248.845 | 1.442 |
| *ServWUE* | 288.057 | 522.377 | 8044.521 | 19.514 |

| **Table 3a.**Tests for cross-sectional dependence in variables. | | | | |
| --- | --- | --- | --- | --- |
| ***Variables*** | ***CDBP*** | ***CDLM*** | ***LMAdj*** | ***CD*** |
| *LnWS* | 2,828.863* | 103.240* | 102.582* | 13.8795* |
| *LnAgritoWS* | 1,456.730* | 47.223* | 46.565* | 0.669 |
| *LnIndtoWS* | 2,053.074* | 71.568* | 70.911* | 19.844* |
| *LnServtoWS* | 1,491.053* | 48.624* | 47.966* | 1.74961*** |
| *LnGDP* | 4,490.981* | 171.096* | 170.438* | 63.517* |
| *LnAgritoGDP* | 1,422.875* | 45.841* | 45.183* | 29.797* |
| *LnIndtoGDP* | 2,352.115* | 83.777* | 83.119* | 36.552* |
| *LnServtoGDP* | 2,289.638* | 81.226* | 80.568* | 35.863* |
| * and *** represents a significance level of 1% and 10% respectively. CDBP: Breusch and Pagan 1980 test, CDLM: Pesaran 2004 CDLM test, LMadj: Bias-adjusted CD test and CD: Pesaran 2004 CD test. | | | | |

| **Table 3b.**Tests for cross-sectional dependence in residuals | | | |
| --- | --- | --- | --- |
| ***Models*** | ***CDBP*** | ***CDLM*** | ***CD*** |
| *Model I* | 2,959.427* | 108.570* | 21.606* |
| *Model II* | 2,733.404* | 99.343* | 17.546* |
| *Model III* | 2,761.375* | 100.485* | 30.975* |
| *Model IV* | 2,715.792* | 98.624* | 30.235* |
| *Model V* | 1,543.233* | 50.754* | 6.601* |
| *Model VI* | 1,552.143* | 51.118* | 3.956* |
| *Model VII* | 1,858.483* | 63.624* | 18.919* |

| **Table 4.**Test forslope homogeneity | | | | |
| --- | --- | --- | --- | --- |
| ***Models*** |  |  |  |  |
| *Model I* | 13.397* | 14.531* | 8.900* | 9.653* |
| *Model II* | 7.574* | 8.215* | 5.263* | 5.709* |
| *Model III* | 19.510* | 21.161* | 14.910* | 16.172* |
| *Model IV* | 21.776* | 23.077* | 15.014* | 16.285* |
| *Model V* | 3.630* | 3.938* | 3.685* | 3.998* |
| *Model VI* | 15.479* | 16.805* | 13.498* | 14.654* |
| *Model VII* | 13.969* | 15.162* | 11.843* | 12.855* |
| and represent the “simple” and “mean variance bias adjusted” slope homogeneity tests, respectively. and represent the “Heteroscedasticity and Autocorrelation Consistent” versions of “simple” and “mean variance bias adjusted” slope homogeneity tests, respectively. * represents a significance level of 1%. | | | | |

| **Table 5.** Fourier Panel Stationarity Test Results | | | | |
| --- | --- | --- | --- | --- |
| ***Variables*** | ***Intercept model*** | | ***Intercept and trend model*** | |
| ***FZ(k) test stat.*** | ***p-value*** | ***FZ(k) test stat.*** | ***p-value*** |
| *LnWS* | 0.984 | 0.163 | 9.617* | 0.000 |
| *LnAgritoWS* | 12.544* | 0.000 | 10.338* | 0.000 |
| *LnIndtoWS* | 4.018* | 0.000 | 8.716* | 0.000 |
| *LnServtoWS* | 4.895* | 0.000 | 9.224* | 0.000 |
| *LnGDP* | 3.365* | 0.000 | 11.428* | 0.000 |
| *LnAgritoGDP* | 5.192* | 0.000 | 6.951* | 0.000 |
| *LnIndtoGDP* | 2.027** | 0.021 | 9.933* | 0.000 |
| *LnServtoGDP* | 2.209** | 0.014 | 7.772* | 0.000 |
| * and ** represents a significance level of 1% and 5% respectively. | | | | |
|  | | | | |
| **Table 6.** Bootstrap for the FFFFF-cointegration test with nonlinearity. | | | | |
| ***Models*** | ***GLS*** | | ***PP*** | |
| ***Test stat.*** | ***p-value*** | ***Test stat.*** | ***p-value*** |
| *Model I* | -4.497** | 0.013 | -5.859 | 0.004 |
| *Model II* | -3.999** | 0.022 | -5.151* | 0.010 |
| *Model III* | -4.328** | 0.018 | -5.223** | 0.012 |
| *Model IV* | -4.397** | 0.013 | -5.505* | 0.009 |
| *Model V* | -4.371* | 0.010 | -5.600* | 0.007 |
| *Model VI* | -4.437** | 0.014 | -5.181** | 0.011 |
| *Model VII* | -4.306** | 0.020 | -5.428* | 0.010 |
| * and ** represents a significance level of 1% and 5% respectively. Both the p-values are based on the 5000 drawings. | | | | |

| **Table 7a.** Linearity Test Results | | |  | |  | |  | |  | | |
| --- | --- | --- | --- | --- | --- | --- | --- | --- | --- | --- | --- |
| *(PSTR model)* | Threshold variables | | | | | | | | | | |
| *LnGDPper* | *LnGDPper* | | *LnGDPper* | | *LnGDPper* | | *AgriWUE* | | *IndWUE* | *ServWUE* |
| Model I | Model II | | Model III | | Model IV | | Model V | | Model VI | Model VII |
| *Wald tests (LM)* | 48.990* | 27.817* | | 44.075* | | 46.600* | | 54.318* | | 331.563* | 146.629* |
|  | (0.000) | (0.000) | | (0.000) | | (0.000) | | (0.000) | | (0.000) | (0.000) |
| *Fisher tests (LMF)* | 51.488* | 27.924 | | 45.823* | | 48.718* | | 57.770* | | 933.058* | 196.683* |
|  | (0.000) | (0.000) | | (0.000) | | (0.000) | | (0.000) | | (0.000) | (0.000) |
| *LRT tests (LRT)* | 51.560* | 28.620 | | 46.140* | | 48.917* | | 57.502* | | 544.024* | 173.545 |
|  | (0.000) | (0.000) | | (0.000) | | (0.000) | | (0.000) | | (0.000) | (0.000) |
| Under , the LM and LRT statistics have an asymptotic ***mK*) distribution, whereas LMF has an asymptotic F (mK,TN-N-m(K +1)) distribution. Moreover, r is the number of transition functions. P-values are in parentheses. * and ** represents a significance level of 1% and 5% respectively. | | | | | | | | | | | |

| **Table 7b.** Regime selection results | | |  | |  | |  | |  | | |
| --- | --- | --- | --- | --- | --- | --- | --- | --- | --- | --- | --- |
|  | Threshold variables | | | | | | | | | | |
| *LnGDPper* | *LnGDPper* | | *LnGDPper* | | *LnGDPper* | | *AgriWUE* | | *IndWUE* | *ServWUE* |
| Model I | Model II | | Model III | | Model IV | | Model V | | Model VI | Model VII |
| *Wald tests (LM)* | 0.170 | 3.503 | | 0.001 | | 1.278 | | 0.019 | | 1.074 | 3.754 |
|  | (0.680) | (0.061) | | (0.978) | | (0.258) | | (0.889) | | (0.300) | (0.053) |
| *Fisher tests (LMF)* | 0.161 | 3.330 | | 0.001 | | 1.209 | | 0.018 | | 1.016 | 3.570 |
|  | (0.689) | (0.069) | | (0.978) | | (0.272) | | (0.892) | | (0.314) | (0.059) |
| *LRT tests (LRT)* | 0.170 | 3.515 | | 0.001 | | 1.279 | | 0.019 | | 1.075 | 3.768 |
|  | (0.680) | (0.061) | | (0.978) | | (0.258) | | (0.889) | | (0.300) | (0.052) |
| Under , the LM and LRT statistics have an asymptotic ***mK*) distribution, whereas LMF has an asymptotic F (mK,TN-N-m(K +1)) distribution. Moreover, r is the number of transition functions. P-values are in parentheses. * and ** represents a significance level of 1% and 5% respectively. | | | | | | | | | | | |

| Table 8a. PSTR model results for main models | | | | | |
| --- | --- | --- | --- | --- | --- |
|  | | **Model I** | **Model II** | **Model III** | **Model IV** |
| *First Regime*  *(*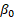*)* | *LnGDP1* | 1.203* | 0.319* | 0.350* | 0.508** |
|  | (0.230) | (0.077) | (0.086) | (0.253) |
| *Second Regime*  *(*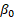*+*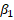*)* | *LnGDP2* | 0.966* | -0.121* | 0.186* | 0.395* |
|  | (0.039) | (0.079) | (0.029) | (0.019) |
|  | Location parameters, | 9.685 | 9.601 | 9.533 | 9.527 |
|  | Slope parameters, | 1.111 | 9.790 | 8.599 | 14.746 |
|  | Dependent variable | *LnWS* | *LnWS* | *LnWS* | *LnWS* |
|  | Threshold variable | *LnGDPper* | *LnGDPper* | *LnGDPper* | *LnGDPper* |
| * and ** indicate significance level at 1% and 5% respectively. Standard errors are corrected for heteroskedasticity in parentheses. | | | | | |

| Table 8b. PSTR model results for sub-models | | | | | | | | |
| --- | --- | --- | --- | --- | --- | --- | --- | --- |
|  | **Model V** | | **Model VI** | | | **Model VII** | | |
| *First Regime*  *(*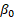*)* | *LnAgritoGDP1* | 0.468** | | *LnIndtoGDP1* | 1.954* | | *LnServtoGDP1* | 0.903* |
|  | (0.177) | |  | (0.105) | |  | (0.221) |
| *Second Regime*  *(*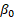*+*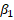*)* | *LnAgritoGDP2* | -16.890* | | *LnIndtoGDP2* | -1.163* | | *LnServtoGDP2* | -0.308* |
|  | (3.181) | |  | (0.141) | |  | (0.028) |
|  | Location parameters, | 6.124 | |  | 6.855 | |  | 7.679 |
|  | Slope parameters, | 0.527 | |  | 0.506 | |  | 0.765 |
|  | Dependent variable | *LnAgritoWS* | |  | *LnIndtoWS* | |  | *LnServtoWS* |
|  | Threshold variable | *LnAgriWUE* | |  | *LnIndWUE* | |  | *LnServWUE* |
| * and ** indicate significance level at 1% and 5% respectively. Standard errors are corrected for heteroskedasticity in parentheses. | | | | | | | | |
